# Supplementary material for: Ways to increase precision and accuracy of wound area measurement using smart devices: Advanced app Planimator
Source: PubMed Central journal article supplement (PMC5837081; doi:10.1371/journal.pone.0192485), 2018-03-05
Supplement: pone.0192485.s001.pdf [file pone.0192485.s001.pdf]

**S1 Table. Results of wound shapes measurements with different methods or devices.**

| ID of wound shape | Reference (true) area of the wound shape [cm <sup>2</sup> ] | Visitrak [cm <sup>2</sup> ] | Silhouette Mobile [cm <sup>2</sup> ] | AreaMe [cm <sup>2</sup> ] | D-SLR Camera [cm <sup>2</sup> ] | Compact Camera [cm <sup>2</sup> ] | Smartphone Camera [cm <sup>2</sup> ] | Planimator [cm <sup>2</sup> ] |
|-------------------|-------------------------------------------------------------|-----------------------------|--------------------------------------|---------------------------|---------------------------------|-----------------------------------|--------------------------------------|-------------------------------|
| 1                 | 1.2152                                                      | 1.2                         | 1.2                                  | 1.17                      | 1.212                           | 1.211                             | 1.221                                | 1.220                         |
| 2                 | 0.4105                                                      | 0.3                         | 0.4                                  | 0.37                      | 0.409                           | 0.410                             | 0.410                                | 0.405                         |
| 3                 | 24.0272                                                     | 24.2                        | 23.9                                 | 23.76                     | 24.249                          | 24.205                            | 23.950                               | 24.077                        |
| 4                 | 19.2750                                                     | 19.1                        | 19.3                                 | 19.01                     | 19.400                          | 19.356                            | 19.506                               | 19.318                        |
| 5                 | 1.1087                                                      | 1.0                         | 1.1                                  | 1.06                      | 1.122                           | 1.115                             | 1.098                                | 1.114                         |
| 6                 | 4.3130                                                      | 4.2                         | 4.3                                  | 4.24                      | 4.353                           | 4.366                             | 4.264                                | 4.314                         |
| 7                 | 5.7868                                                      | 5.7                         | 5.7                                  | 5.66                      | 5.805                           | 5.816                             | 5.749                                | 5.790                         |
| 8                 | 4.5932                                                      | 4.4                         | 4.5                                  | 4.48                      | 4.586                           | 4.575                             | 4.539                                | 4.574                         |
| 9                 | 0.9152                                                      | 0.8                         | 0.9                                  | 0.88                      | 0.916                           | 0.925                             | 0.907                                | 0.919                         |
| 10                | 4.3735                                                      | 4.0                         | 4.4                                  | 4.26                      | 4.374                           | 4.432                             | 4.330                                | 4.391                         |
| 11                | 3.7463                                                      | 3.5                         | 3.7                                  | 3.72                      | 3.779                           | 3.693                             | 3.721                                | 3.753                         |
| 12                | 0.1402                                                      | 0.1                         | 0.1                                  | 0.12                      | 0.138                           | 0.140                             | 0.138                                | 0.140                         |
| 13                | 0.2603                                                      | 0.2                         | 0.2                                  | 0.23                      | 0.257                           | 0.259                             | 0.257                                | 0.261                         |
| 14                | 0.5422                                                      | 0.4                         | 0.5                                  | 0.51                      | 0.535                           | 0.538                             | 0.538                                | 0.534                         |
| 15                | 10.6508                                                     | 10.3                        | 10.6                                 | 10.66                     | 10.722                          | 10.756                            | 10.604                               | 10.592                        |
| 16                | 4.7445                                                      | 4.4                         | 4.7                                  | 4.63                      | 4.755                           | 4.757                             | 4.720                                | 4.732                         |
| 17                | 1.8776                                                      | 1.6                         | 1.8                                  | 1.84                      | 1.871                           | 1.881                             | 1.862                                | 1.875                         |
| 18                | 0.6715                                                      | 0.6                         | 0.7                                  | 0.67                      | 0.668                           | 0.666                             | 0.663                                | 0.661                         |
| 19                | 0.8302                                                      | 0.6                         | 0.8                                  | 0.79                      | 0.831                           | 0.835                             | 0.825                                | 0.833                         |
| 20                | 2.5021                                                      | 2.3                         | 2.4                                  | 2.39                      | 2.505                           | 2.522                             | 2.479                                | 2.490                         |
| 21                | 1.5986                                                      | 1.4                         | 1.6                                  | 1.51                      | 1.602                           | 1.603                             | 1.605                                | 1.600                         |
| 22                | 1.0288                                                      | 0.8                         | 1.0                                  | 1.01                      | 1.030                           | 1.029                             | 1.028                                | 1.027                         |
| 23                | 5.8485                                                      | 5.6                         | 5.7                                  | 5.72                      | 5.848                           | 5.852                             | 5.790                                | 5.808                         |
| 24                | 0.6742                                                      | 0.6                         | 0.7                                  | 0.63                      | 0.670                           | 0.677                             | 0.674                                | 0.673                         |
| 25                | 1.9419                                                      | 1.8                         | 1.9                                  | 1.86                      | 1.938                           | 1.934                             | 1.909                                | 1.931                         |
| 26                | 1.7756                                                      | 1.6                         | 1.7                                  | 1.70                      | 1.776                           | 1.769                             | 1.777                                | 1.773                         |
| 27                | 3.4168                                                      | 2.9                         | 3.3                                  | 3.29                      | 3.417                           | 3.447                             | 3.410                                | 3.400                         |
| 35                | 0.4199                                                      | 0.3                         | 0.4                                  | 0.36                      | 0.420                           | 0.420                             | 0.424                                | 0.417                         |
| 39                | 4.9513                                                      | 4.7                         | 4.9                                  | 4.84                      | 4.958                           | 4.973                             | 4.970                                | 4.936                         |
| 50                | 0.7440                                                      | 0.6                         | 0.7                                  | 0.66                      | 0.741                           | 0.745                             | 0.747                                | 0.744                         |
| 52                | 1.6674                                                      | 1.5                         | 1.6                                  | 1.62                      | 1.666                           | 1.670                             | 1.678                                | 1.665                         |
| 68                | 1.3416                                                      | 1.2                         | 1.3                                  | 1.33                      | 1.342                           | 1.348                             | 1.356                                | 1.338                         |
| 70                | 2.7182                                                      | 2.7                         | 2.7                                  | 2.68                      | 2.707                           | 2.714                             | 2.691                                | 2.704                         |
| 73                | 12.3673                                                     | 12.3                        | 12.1                                 | 12.10                     | 12.397                          | 12.357                            | 12.255                               | 12.217                        |
| 75                | 1.4416                                                      | 1.4                         | 1.4                                  | 1.40                      | 1.437                           | 1.449                             | 1.440                                | 1.447                         |
| 80                | 29.5987                                                     | 28.9                        | 29.5                                 | 29.38                     | 29.635                          | 29.581                            | 29.350                               | 29.386                        |
| 83                | 3.2192                                                      | 3.1                         | 3.2                                  | 3.14                      | 3.216                           | 3.228                             | 3.237                                | 3.220                         |
| 96                | 15.9624                                                     | 15.6                        | 16.0                                 | 15.77                     | 16.042                          | 16.051                            | 16.028                               | 15.950                        |
| 101               | 24.2392                                                     | 23.9                        | 24.0                                 | 24.13                     | 24.390                          | 24.291                            | 24.322                               | 24.148                        |
| 108               | 31.7176                                                     | 30.7                        | 31.6                                 | 31.36                     | 31.862                          | 32.030                            | 31.712                               | 31.756                        |
