# Supplementary material for: Ways to increase precision and accuracy of wound area measurement using smart devices: Advanced app Planimator
Source: PubMed Central journal article supplement (PMC5837081; doi:10.1371/journal.pone.0192485), 2018-03-05
Supplement: pone.0192485.s002.pdf [file pone.0192485.s002.pdf]

**S2 Table. Results of area measurements of one wound shape with Planimator app for different tilt angles with correction switched on or off.**

| No. | Tilt angle [deg] | Correction (On or Off) | Measured area with Planimator [cm <sup>2</sup> ] |
|-----|------------------|------------------------|--------------------------------------------------|
| 1   | 0                | On                     | 24.797                                           |
| 2   | 0                | On                     | 24.808                                           |
| 3   | 0                | On                     | 24.726                                           |
| 4   | 0                | On                     | 24.763                                           |
| 5   | 0                | On                     | 24.733                                           |
| 6   | 0                | On                     | 24.735                                           |
| 7   | 0                | On                     | 24.814                                           |
| 8   | 0                | On                     | 24.850                                           |
| 9   | 0                | On                     | 24.833                                           |
| 10  | 0                | On                     | 24.791                                           |
| 11  | 0                | On                     | 24.887                                           |
| 12  | 0                | On                     | 24.830                                           |
| 13  | 0                | Off                    | 24.814                                           |
| 14  | 0                | Off                    | 24.759                                           |
| 15  | 0                | Off                    | 24.776                                           |
| 16  | 0                | Off                    | 24.854                                           |
| 17  | 0                | Off                    | 24.887                                           |
| 18  | 0                | Off                    | 24.730                                           |
| 19  | 0                | Off                    | 24.810                                           |
| 20  | 0                | Off                    | 24.842                                           |
| 21  | 0                | Off                    | 24.823                                           |
| 22  | 0                | Off                    | 24.748                                           |
| 23  | 0                | Off                    | 24.805                                           |
| 24  | 0                | Off                    | 24.816                                           |
| 25  | 5                | On                     | 24.804                                           |
| 26  | 5                | On                     | 24.736                                           |
| 27  | 5                | On                     | 24.793                                           |
| 28  | 5                | On                     | 24.728                                           |
| 29  | 5                | On                     | 24.862                                           |
| 30  | 5                | On                     | 24.812                                           |
| 31  | 5                | On                     | 24.738                                           |
| 32  | 5                | On                     | 24.838                                           |
| 33  | 5                | On                     | 24.806                                           |
| 34  | 5                | On                     | 24.733                                           |
| 35  | 5                | On                     | 24.705                                           |
| 36  | 5                | On                     | 24.754                                           |
| 37  | 5                | Off                    | 24.627                                           |
| 38  | 5                | Off                    | 24.587                                           |
| 39  | 5                | Off                    | 24.667                                           |

|    |    |     |        |
|----|----|-----|--------|
| 40 | 5  | Off | 24.608 |
| 41 | 5  | Off | 24.623 |
| 42 | 5  | Off | 24.579 |
| 43 | 5  | Off | 24.728 |
| 44 | 5  | Off | 24.644 |
| 45 | 5  | Off | 24.619 |
| 46 | 5  | Off | 24.648 |
| 47 | 5  | Off | 24.604 |
| 48 | 5  | Off | 24.608 |
| 49 | 10 | On  | 24.823 |
| 50 | 10 | On  | 24.871 |
| 51 | 10 | On  | 24.885 |
| 52 | 10 | On  | 24.883 |
| 53 | 10 | On  | 24.865 |
| 54 | 10 | On  | 24.859 |
| 55 | 10 | On  | 24.759 |
| 56 | 10 | On  | 24.718 |
| 57 | 10 | On  | 24.762 |
| 58 | 10 | On  | 24.798 |
| 59 | 10 | On  | 24.744 |
| 60 | 10 | On  | 24.680 |
| 61 | 10 | Off | 24.425 |
| 62 | 10 | Off | 24.480 |
| 63 | 10 | Off | 24.382 |
| 64 | 10 | Off | 24.415 |
| 65 | 10 | Off | 24.479 |
| 66 | 10 | Off | 24.436 |
| 67 | 10 | Off | 24.334 |
| 68 | 10 | Off | 24.348 |
| 69 | 10 | Off | 24.312 |
| 70 | 10 | Off | 24.275 |
| 71 | 10 | Off | 24.237 |
| 72 | 10 | Off | 24.297 |
| 73 | 15 | On  | 24.816 |
| 74 | 15 | On  | 24.871 |
| 75 | 15 | On  | 24.939 |
| 76 | 15 | On  | 24.841 |
| 77 | 15 | On  | 24.837 |
| 78 | 15 | On  | 24.815 |
| 79 | 15 | On  | 24.678 |
| 80 | 15 | On  | 24.689 |
| 81 | 15 | On  | 24.634 |
| 82 | 15 | On  | 24.768 |
| 83 | 15 | On  | 24.695 |
| 84 | 15 | On  | 24.617 |
| 85 | 15 | Off | 23.861 |
| 86 | 15 | Off | 23.908 |
| 87 | 15 | Off | 23.935 |

|     |    |     |        |
|-----|----|-----|--------|
| 88  | 15 | Off | 23.798 |
| 89  | 15 | Off | 23.849 |
| 90  | 15 | Off | 23.820 |
| 91  | 15 | Off | 23.791 |
| 92  | 15 | Off | 23.869 |
| 93  | 15 | Off | 23.800 |
| 94  | 15 | Off | 23.818 |
| 95  | 15 | Off | 23.727 |
| 96  | 15 | Off | 23.768 |
| 97  | 20 | On  | 24.555 |
| 98  | 20 | On  | 24.682 |
| 99  | 20 | On  | 24.704 |
| 100 | 20 | On  | 24.765 |
| 101 | 20 | On  | 24.719 |
| 102 | 20 | On  | 24.791 |
| 103 | 20 | On  | 24.759 |
| 104 | 20 | On  | 24.733 |
| 105 | 20 | On  | 24.660 |
| 106 | 20 | On  | 24.745 |
| 107 | 20 | On  | 24.782 |
| 108 | 20 | On  | 24.690 |
| 109 | 20 | Off | 23.215 |
| 110 | 20 | Off | 23.125 |
| 111 | 20 | Off | 23.147 |
| 112 | 20 | Off | 23.173 |
| 113 | 20 | Off | 23.244 |
| 114 | 20 | Off | 23.213 |
| 115 | 20 | Off | 23.169 |
| 116 | 20 | Off | 23.102 |
| 117 | 20 | Off | 23.106 |
| 118 | 20 | Off | 23.187 |
| 119 | 20 | Off | 23.198 |
| 120 | 20 | Off | 23.153 |
